# Supplementary material
Source: PubMed Central journal article supplement (PMC3404749)
Supplement: NIHMS359953-supplement-1_si_001.pdf [file NIHMS359953-supplement-1_si_001.pdf]

## Supplemental Materials

**Choice of reaction time and amounts of SULT1A3 or Caco-2 lysate used.** The length of incubation was chosen so that the reaction time was at least 5 min but not longer than 30 min when using SULT1A3 or at least 5 min but not longer than 60 min when using Caco-2 cell lysate, except for genistein, where a reaction time of 480 min was used. The shorter reaction time (5 min) was for compounds that were rapidly metabolized to ensure that percentages metabolized would not exceed 35%, the linear range for amount formed vs. time curve. The longer reaction time was used to ensure that slowly metabolized compounds will have produced a reasonable peak area for measurement (above the lower concentration in the linear response range). Amounts of SULT1A3, which is proportional to the protein concentration, used was also varied to ensure proper quantification while maintaining substrate starting concentration for the duration of the reactions.

Table 1. The reaction conditions of sulfation activities of flavonoids at the substrate concentration of **2.5  $\mu$ M** by expressed human **SULT1A3**

| Compounds  | Compounds Concentration | Protein Concentration (expressed SULT1A3) | Reaction Time (Incubating Time) |
|------------|-------------------------|-------------------------------------------|---------------------------------|
| Naringenin | 2.5 $\mu$ M             | 0.0053 mg/ml                              | 5 min                           |
| Phloretin  | 2.5 $\mu$ M             | 0.0053 mg/ml                              | 30 min                          |
| Genistein  | 2.5 $\mu$ M             | 0.0053 mg/ml                              | 30 min                          |
| Apigenin   | 2.5 $\mu$ M             | 0.0053 mg/ml                              | 5 min                           |
| Kaempferol | 2.5 $\mu$ M             | 0.0053 mg/ml                              | 5 min                           |
| 4'HF       | 2.5 $\mu$ M             | 0.0053 mg/ml                              | 30 min                          |
| 5HF        | 2.5 $\mu$ M             | 0.0053 mg/ml                              | 30 min                          |
| 7HF        | 2.5 $\mu$ M             | 0.0053 mg/ml                              | 5 min                           |
| 5,4'DHF    | 2.5 $\mu$ M             | 0.0053 mg/ml                              | 5 min                           |
| 5,7DHF     | 2.5 $\mu$ M             | 0.00267 mg/ml                             | 5 min                           |
| 7,4'DHF    | 2.5 $\mu$ M             | 0.0053 mg/ml                              | 5 min                           |
| 3HF        | 2.5 $\mu$ M             | 0.0053 mg/ml                              | 30 min                          |
| 3,4'DHF    | 2.5 $\mu$ M             | 0.0053 mg/ml                              | 30 min                          |
| 3,7DHF     | 2.5 $\mu$ M             | 0.00267 mg/ml                             | 5 min                           |
| 3,5,7THF   | 2.5 $\mu$ M             | 0.00267 mg/ml                             | 5 min                           |
| 3,7,4'THF  | 2.5 $\mu$ M             | 0.0053 mg/ml                              | 5 min                           |

Table 2. The reaction conditions of sulfation activities of flavonoids at the substrate concentration of **10  $\mu$ M** by expressed human **SULT1A3**

| Compounds  | Compounds Concentration | Protein Concentration (expressed SULT1A3) | Reaction Time (Incubating Time) |
|------------|-------------------------|-------------------------------------------|---------------------------------|
| Naringenin | 10 $\mu$ M              | 0.0053 mg/ml                              | 10 min                          |
| Phloretin  | 10 $\mu$ M              | 0.0053 mg/ml                              | 30 min                          |
| Genistein  | 10 $\mu$ M              | 0.0053 mg/ml                              | 30 min                          |

|            |            |               |        |
|------------|------------|---------------|--------|
| Apigenin   | 10 $\mu$ M | 0.0053 mg/ml  | 10 min |
| Kaempferol | 10 $\mu$ M | 0.0053 mg/ml  | 10 min |
| 4'HF       | 10 $\mu$ M | 0.0053 mg/ml  | 30 min |
| 5HF        | 10 $\mu$ M | 0.0053 mg/ml  | 30 min |
| 7HF        | 10 $\mu$ M | 0.0053 mg/ml  | 10 min |
| 5,4'DHF    | 10 $\mu$ M | 0.0053 mg/ml  | 10 min |
| 5,7DHF     | 10 $\mu$ M | 0.00267 mg/ml | 10 min |
| 7,4'DHF    | 10 $\mu$ M | 0.0053 mg/ml  | 10 min |
| 3HF        | 10 $\mu$ M | 0.0053 mg/ml  | 30 min |
| 3,4'DHF    | 10 $\mu$ M | 0.0053 mg/ml  | 30 min |
| 3,7DHF     | 10 $\mu$ M | 0.00267 mg/ml | 10 min |
| 3,5,7THF   | 10 $\mu$ M | 0.00267 mg/ml | 10 min |
| 3,7,4'THF  | 10 $\mu$ M | 0.0053 mg/ml  | 10 min |

Table 3. The reaction conditions of sulfation activities of flavonoids at the substrate concentration of **2.5  $\mu$ M** by **Caco-2 cell lysates**

| Compounds  | Compounds Concentration | Protein Concentration (Caco-2 cell lysates) | Reaction Time (Incubating Time) |
|------------|-------------------------|---------------------------------------------|---------------------------------|
| Naringenin | 2.5 $\mu$ M             | 0.5 mg/ml                                   | 30 min                          |
| Phloretin  | 2.5 $\mu$ M             | 0.5 mg/ml                                   | 60 min                          |
| Genistein  | 2.5 $\mu$ M             | 2 mg/ml                                     | 480 min                         |
| Apigenin   | 2.5 $\mu$ M             | 0.5 mg/ml                                   | 10 min                          |
| Kaempferol | 2.5 $\mu$ M             | 0.5 mg/ml                                   | 30 min                          |
| 4'HF       | 2.5 $\mu$ M             | 0.5 mg/ml                                   | 30 min                          |
| 5HF        | 2.5 $\mu$ M             | 2 mg/ml                                     | 60 min                          |
| 7HF        | 2.5 $\mu$ M             | 0.5 mg/ml                                   | 10 min                          |
| 5,4'DHF    | 2.5 $\mu$ M             | 2 mg/ml                                     | 60 min                          |
| 5,7DHF     | 2.5 $\mu$ M             | 0.5 mg/ml                                   | 10 min                          |
| 7,4'DHF    | 2.5 $\mu$ M             | 0.5 mg/ml                                   | 10 min                          |
| 3HF        | 2.5 $\mu$ M             | 2 mg/ml                                     | 60 min                          |
| 3,4'DHF    | 2.5 $\mu$ M             | 2 mg/ml                                     | 60 min                          |
| 3,7DHF     | 2.5 $\mu$ M             | 0.5 mg/ml                                   | 5 min                           |
| 3,5,7THF   | 2.5 $\mu$ M             | 0.5 mg/ml                                   | 10 min                          |
| 3,7,4'THF  | 2.5 $\mu$ M             | 0.5 mg/ml                                   | 5 min                           |

Table 4. The reaction conditions of sulfation activities of flavonoids at the substrate concentration of **10  $\mu$ M** by **Caco-2 cell lysates**

| Compounds  | Compounds Concentration | Protein Concentration (Caco-2 cell lysates) | Reaction Time (Incubating Time) |
|------------|-------------------------|---------------------------------------------|---------------------------------|
| Naringenin | 10 $\mu$ M              | 1 mg/ml                                     | 60 min                          |
| Phloretin  | 10 $\mu$ M              | 2 mg/ml                                     | 60 min                          |
| Genistein  | 10 $\mu$ M              | 2 mg/ml                                     | 480 min                         |
| Apigenin   | 10 $\mu$ M              | 1 mg/ml                                     | 20 min                          |
| Kaempferol | 10 $\mu$ M              | 2 mg/ml                                     | 60 min                          |
| 4'HF       | 10 $\mu$ M              | 2 mg/ml                                     | 60 min                          |
| 5HF        | 10 $\mu$ M              | 2 mg/ml                                     | 60 min                          |
| 7HF        | 10 $\mu$ M              | 1 mg/ml                                     | 15 min                          |
| 5,4'DHF    | 10 $\mu$ M              | 2 mg/ml                                     | 60 min                          |

|           |            |         |        |
|-----------|------------|---------|--------|
| 5,7DHF    | 10 $\mu$ M | 1 mg/ml | 20 min |
| 7,4'DHF   | 10 $\mu$ M | 1 mg/ml | 20 min |
| 3HF       | 10 $\mu$ M | 2 mg/ml | 60 min |
| 3,4'DHF   | 10 $\mu$ M | 2 mg/ml | 60 min |
| 3,7DHF    | 10 $\mu$ M | 1 mg/ml | 10 min |
| 3,5,7THF  | 10 $\mu$ M | 1 mg/ml | 20 min |
| 3,7,4'THF | 10 $\mu$ M | 1 mg/ml | 10 min |
